# Supplementary material for: Investigation the DNA binding ability of CIA5 in Chlamydomonas reinhardtii
Source: Research Square preprint supplement (doi:10.21203/rs.3.rs-4446510/v1), 2024-05-30
Supplement: Supplementary file 1 [file 41f5b39032d7bf891ac9bbf1.docx]

Investigation the DNA binding ability of CIA5 in *Chlamydomonas reinhardtii*

Bo Chena, b * and Martin H. Spaldingb*

a Panxi Crops Research and Utilization Key Laboratory of Sichuan Province, Xichang University, Sichuan, China 615000

b Department of Genetics, Development, and Cell Biology, Iowa State University, Ames, IA 50011

*: Corresponding Author:

Bo Chen

Telephone: +8619198927306

Martin H. Spalding

Telephone: +1515 294-1749

FAX: 515 294-1303

This paper demonstrates that CIA5 proteins has potential interaction with specific DNA sequences using random binding site selection (RBSS), which was confirmed using a gel mobility shift assay (GMSA) to demonstrate highly specific protein-DNA interaction with purified, full-length CIA5. In addition, promoter fragments containing a 9-bp GC rich (GGGGCGGGG) candidate motif from three CIA5-dependent genes also showed highly specific protein-DNA interaction with CIA5, although the GMSA interactions were somewhat weaker than with the RBSS-identified sequence. Nonetheless, this work clearly provides the first direct evidence that CIA5 can bind specific DNA sequences *in vitro* and thus opens the way for more extensive *in vivo* experiments to determine whether the specific DNA-binding of CIA5 has any biological relevance *in vivo*.

Supplemental information

**S1. Materials and Methods**

*S1.1 Constructs for ad1 complementation*

It has been reported that some C2H2 type Zn-finger proteins, such as transcription factor Sp1 (specificity protein 1), strongly bind to G-rich elements such as GC (GGGGCGGGG) and GT/CACC boxes (GGTGTGGGG) [1, 2]. The GGGGCGGGG motif was found in multiple CIA5-regulated genes. To test whether CIA5 can bind the GGGGCGGG DNA motif *in vivo*, modified pBluescript II KS_LCIB plasmid containing *LCIB* genomic DNA (Fig. S1) was used to complement the *ad1* mutant. *LCIB* genomic DNA was inserted into this plasmid through *Sfu*I/*BamH*I site, and *LCI1*, *LCIB* and *LCI5* promoters (around 800bp ~ 1000bp upstream of +1) with either wild-type or mutated GGGGCGGGG motif (amplifying primers in Table S6) were inserted in place of the original promoter. The 5P and 3P primer pairs were used to amplify wild-type promoters from Chlamydomonas genomic DNA, and the 5P/MR or MF/3P primer pairs were applied to amplify fragments with mutations and used to generate the mutated promoter by fusion PCR. All promoters were inserted into pBluescript II KS_LCIB through *Not*I/*Sfu*I site to replace the original promoter and to make 8 final constructs named LCI1PB, LCI1PBM, LCIBPB, LCIBPBM, LCI5PB and LCI5PBM1/M2/M3 (M stands for mutation), which were all transformed into Chlamydomonas *ad1* cells by glass bead transformation performed as described previously [3].

*S1.2 Gene expression analysis*

RNA was extracted with an RNeasy Plant Mini Kit (Qiagen, Cat. No. 74904), and the RNA concentration was measured using an ND-2000 Nanodrop spectrophotometer (Nanodrop Technologies). 1-5 μg total RNA was treated with TURBO DNA-FreeTM kit (Life Technologies), and cDNA was generated from 0.5 μg -1 μg of treated total RNA (Verso cDNA Synthesis Kit; Thermo Scientific). cDNA (25-50 ng) was used for reverse transcription polymerase chain reaction (RT-PCR) and for quantitative RT-PCR (qRT-PCR) with a CFX Connect™ Real-Time PCR Detection System (Biorad) using a SYBR green two-step quantitative PCR system (Quanta Biosciences). Primer sequences and efficiencies are provided as supplemental information (Table S6). . For quantitative analyses, the CBLP gene was used as an internal control for normalization of qRT-PCR data [4]. The relative transcript abundance in each sample is defined as ∆Ct = Ct(target gene)-Ct(CBLP) to represent the difference between the transcript abundance of genes examined and the transcript abundance of CBLP.

*S1.3 Western immunoblot analysis*

For western immunoblotting, total protein was obtained as described previously [5]. Proteins were separated by SDS-PAGE on 4-12% gradient polyacrylamide gels, and immunoblotting using an anti-His-tag antibody (Pierce, Cat. No. MA1-21315) or anti-CIA5 antibody 1 and anti-CIA5 antibody 2 was performed as described in the protocol from Bio-Rad Laboratories (catalog no. 500-0006).

S2 Results

*S2.1 The effect of replaced promoter on complementation with ad1 mutant*

To test whether there is protein-DNA interaction *in vivo* between CIA5 and the GC rich motif identified in the BioProspector analysis (GGGGCGGGG), modified constructs containing *LCIB* genomic DNA (Fig. S1) and *LCI1*, *LCI5* and *LCIB* promoters with either wild-type or mutated motifs (Table S6) were used to complement the air-dier phenotype of the *LCIB* *ad1* mutant. If the GC rich motif is vital and essential for CIA5 binding *in vivo* to regulate target gene expression, the mutated promoters should not allow CIA5 binding, as was seen for the *LCI5*-derived motif *in vitro* (Fig. 5).

This predicted decrease in CIA5/CCM1 binding might be expected to prevent the constructs from complementing *ad1*, and might be expected to either decrease or increase *LCIB* expression in the complemented lines. The 8 constructs containing *LCIB* genomic DNA combined with either wild-type or mutated *LCI1*, *LCIB* and *LCI5* promoters (the sequences used to amplify the promoter as shown in Table S6) were transformed into *ad1*, and all 8 constructs were able to complement *ad1*, that is, all enabled *ad1* transformants to grow under air-level CO2. *LCIB* expression was assessed at both the transcriptional and translational levels in all transformants. Western immunoblot analysis using specific anti-LCIB antibody (Fig. S6A), showed LCIB was expressed in all transformants with either the wild-type or mutated promoters but not in the *ad1* mutant, which indicated that all constructs with alternative promoters (either wild type or mutated) successfully complemented the mutant. However, when compared with wild type CW10, the expressed LCIB protein levels were lower than wild type in all transformant lines either under high CO2 or when induced with air-level CO2. *LCIB* transcript expression results from both RT-PCR (Fig. S6B) and qRT-PCR (Fig. S6C) yielded very similar results to the western immunoblot results in confirming that all three promoters enabled expression of the *LCIB* gene. In addition, both western immunoblots and qRT-PCR results indicated that all three promoters provided higher expression in air-level CO2 than in high-CO2, as would be expected if they functioned normally. However, there was no clear indication that any of the mutated promoters had a negative impact on *LCIB* expression.

**Table S1.** The receipt for making *E. coli* competent cells.

| Buffers | concentrations | components | | Notes |
| --- | --- | --- | --- | --- |
| Buffer 1 | 100mM RbCl | 6.05 g | RbCl | TOTAL: 500mL, adjust pH to 5.8 with acetic acid (Better to use diluted acetic acid). Filter sterilize through a prerinsed 0.22 μm membrane |
| 50mM MnCl2 | 4.95 g | MnCl2.4H2O |
| 30mM KAc | 1.47 g | KAc |
| 10mM CaCl2 | 0.735 g | CaCl2.2H2O |
| 15% Glycerol | 75mL | Glycerol |
|  |  |  |  |  |
| Buffer 2 | 10mM MOPS | 209mg | MOPS | TOTAL: 100mL, adjust pH to 6.8 with NaOH. Filter sterilize through a prerinsed 0.22μm membrane |
| 10mM RbCl | 121mg | RbCl |
| 75mM CaCl2 | 1.1g | CaCl2.2H2O |
| 15% Glycerol | 15mL | Glycerol |
|  |  |  |  |  |
| SOB |  | 2% | Bactotyptone | Autoclave and then add, filter sterilized,10mM MgSO4 and 10mM MgCl2. |
|  | 0.50% | Bacto Yeast Extract |
|  | 10mM | NaCl |
|  | 2.5mM | KCl |

**Table S2.** CIA5 possible biding site from random binding site selection (RBSS).

| Candidate binding site sequences from RBSS | |
| --- | --- |
| ----ACTAGGCAG**GGTT**ACA-------- | ----TACTCTCCG**GGT**CAAT-------- |
| ----ACTAGGCAG**GGTT**ACA-------- | ---ACGGGGATGG**GGT**CGC--------- |
| ----ACTAGGCAG**GGTT**ACA-------- | ------GCAGTAG**GGT**CTTGGG------ |
| ----ACTAGGCAG**GGTT**ACA-------- | ----------CCT**GGT**GGATTACGTT-- |
| ----ACTAGGCAG**GGTT**ACA-------- | -ACCAAGTTCTGG**GGT**A----------- |
| ----ACTAGGCAG**GGTT**ACA-------- | --AGTGTTGTCTC**GGT**GA---------- |
| -----GTGGCTTA**GGTT**GCAA------- | ---G**GGT**CAACAG**GGT**ATA--------- |
| -----GTGGCTTA**GGTT**GCAA------- | -ACCAAGTTCTGG**GGT**A----------- |
| -----GTGGCTTA**GGTT**GCAA------- | --------ATGGG**GGT**CGAGAATA---- |
| -----GTGGCTTA**GGTT**GCAA------- | --------TCAAC**GGT**AATTAACA---- |
| ------**GGT**CTGA**GGTT**ACCCG------ | ---------TACG**GGT**GGAGGCACG--- |
| --------CGTTA**GGTT**ACCTACT---- | -----ACGAAGGA**GGT**AAATC------- |
| -------TACAAA**GGTT**CAAGGC----- | ------------A**GGT**CGGATTCGCTAG |
| ---AAGTAGATAA**GGTT**AC--------- | ----TGG**GGT**GGG**GGT**GTGG-------- |
| -----------CT**GGTT**GGACTGAAAG- | --TAAAAGGGATC**GGT**CT---------- |
| ------------C**GGTT**CTGCAGCTTCG | ---------AGTG**GGT**GGGACGAAG--- |
| ---ACTCCCCGTT**GGTT**CG--------- | TAGAACTCGCTGT**GGT**------------ |
| --CGTGGCCTTGT**GGTT**G---------- | ------------C**GGT**GATACAGCTGGG |
| -----------GT**GGTT**ACCAAGGAAA- | ------TCAGTGG**GGT**GTAAGT------ |
| ---TCAATATTTG**GGT**AAA--------- | -----------AA**GGT**GTAGGGGATAC- |
| ------GCGCCTG**GGT**GCCAAG------ | TTCTCGATCCAAA**GGT**------------ |
| ----AAGTCCGTA**GGT**CAAA-------- | ------GTGCGAA**GGT**AGGATA------ |
| ----------GCA**GGT**GAGACGCGGG-- | ---------CATG**GGT**GCAGTATAT--- |


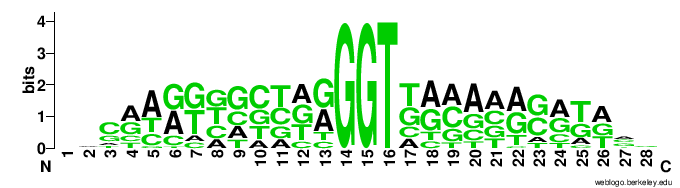


**Table S2.** CIA5 possible biding site from random binding site selection (RBSS). RBSS was performed as described in Material and Methods. After five to eight rounds of selection, protein-DNA complexes were separated by electrophoresis with a 5% polyacrylamide gel and bound DNA was recovered by ethanol precipitation and ampliﬁed by PCR. The PCR products cloned into pGEM®-T Vector yielded 88 sequences, about 46 of which contained the core sequences either GGT or GGTT and sequence log was also generated based on all 46 sequences.

Table S3: Possible CIA5/CCM1 binding motif

| No. | Sequence Name | Bases | Sequence |
| --- | --- | --- | --- |
| **1** | LCI1 motif F | 29 | TGGCGAGTTG**GGGGCGGGG**TTGCATGCGA |
| LCI1 motif R | 29 | TCGCATGCAA**CCCCGCCCC**CAACTCGCCA |
| **2** | LCIB motif F | 29 | CTGGGGTGGC**GGGGCGGGG**CCGTGGGCGT |
| LCIB motif R | 29 | ACGCCCACGG**CCCCGCCCC**GCCACCCCAG |
| **3** | LCIC motif F | 29 | TCAGGGGCGT**GGGGGGGGG**GCTAGAAGGG |
| LCIC motif R | 29 | CCCTTCTAGC**CCCCCCCCC**ACGCCCCTGA |
| **4** | CCP1 motif F | 29 | TGGAAATCAT**GCGGGGGCG**AGCGGCATTC |
| CCP1 motif R | 29 | GAATGCCGCT**CGCCCCCGC**ATGATTTCCA |
| **5** | CCP2 motif F | 29 | TGGACATCAT**GCGGGGGCG**AGCGGCGTTC |
| CCP2 motif R | 29 | GAACGCCGCT**CGCCCCCGC**ATGATGTCCA |
| **6** | LCI5 motif F | 29 | TTTGAGGAGC**GGGGCGGGG**CCATTCCTCC |
| LCI5 motif R | 29 | GGAGGAATGG**CCCCGCCCC**GCTCCTCAAA |
| **7** | Lhcsr1 motif F | 29 | TGCTGTGCAG**GGGGCGGGG**AGGGGGGGGG |
| Lhcsr1 motif R | 29 | CCCCCCCCCT**CCCCGCCCC**CTGCACAGCA |
| **8** | CAH3 motif F | 29 | ACTGCGGGGG**GGGGCGGGG**AGAGGGCCCC |
| CAH3 motif R | 29 | GGGGCCCTCT**CCCCGCCCC**CCCCCGCAGT |

**Table S3.** The sequences used for GMSA from promoters of 8 candidate genes. Sequences from the promoters were identified by Bioprospector and used for GMSA. Bold red text indicates the 9-nt GC rich motif identified in Bioprospector, which was flanked on each side by 10 nucleotide acids from each promoter. Also shown are mutations within the GGGGCGGGG motif indicated with blue text.

Table S4. Gel Mobility Shift Assay (GMSA) working sheet Date:

|  |  | 1 | 2 | 3 | 4 | 5 | 6 | 7 | 8 | 9 | 10 | 11 | 12 | 13 | 14 | 15 | 16 | 17 | 18 | 19 | 20 |
| --- | --- | --- | --- | --- | --- | --- | --- | --- | --- | --- | --- | --- | --- | --- | --- | --- | --- | --- | --- | --- | --- |
| H2O | µl |  |  |  |  |  |  |  |  |  |  |  |  |  |  |  |  |  |  |  |  |
| 4×Buffer | µl | 5 | 5 | 5 | 5 | 5 | 5 | 5 | 5 | 5 | 5 | 5 | 5 | 5 | 5 | 5 | 5 | 5 | 5 | 5 | 5 |
| dI-dC or dA-dT | µl | 1 | 1 | 1 | 1 | 1 | 1 | 1 | 1 | 1 | 1 | 1 | 1 | 1 | 1 | 1 | 1 | 1 | 1 | 1 | 1 |
| Probe (unlabeled) | µl |  |  |  |  |  |  |  |  |  |  |  |  |  |  |  |  |  |  |  |  |
| Proteins | µl |  |  |  |  |  |  |  |  |  |  |  |  |  |  |  |  |  |  |  |  |
| Antibody | µl |  |  |  |  |  |  |  |  |  |  |  |  |  |  |  |  |  |  |  |  |
| Incubate on ice for 10 min | | | | | | | | | | | | | | | | | | | | | |
| Probe (labeled) | µl |  |  |  |  |  |  |  |  |  |  |  |  |  |  |  |  |  |  |  |  |
| Others | µl |  |  |  |  |  |  |  |  |  |  |  |  |  |  |  |  |  |  |  |  |
| Incubate on ice for 30 min | | | | | | | | | | | | | | | | | | | | | |

**Table S4.** Gel mobility shift assay (GMSA) working sheet. Each agents were added to the reaction according to the order on the working sheet.

LCI5 motif mutant

|  | Forward sequence | Reverse sequence |
| --- | --- | --- |
| **LCI5** | TTTGAGGAGC**GGGGCGGGG**CCATTCCTCC | GGAGGAATGG**CCCCGCCCC**GCTCCTCAAA |
| **M1** | TTTGAGGAGC**GGGGTGGGG**CCATTCCTCC | GGAGGAATGG**CCCCACCCC**GCTCCTCAAA |
| **M2** | TTTGAGGAGC**GGGTCGGGG**CCATTCCTCC | GGAGGAATGG**CCCCGACCC**GCTCCTCAAA |
| **M3** | TTTGAGGAGC**GGAGCGGGG**CCATTCCTCC | GGAGGAATGG**CCCCGCTCC**GCTCCTCAAA |
| **M4** | TTTGAGGAGC**GGGGCAGGG**CCATTCCTCC | GGAGGAATGG**CCCTGCCCC**GCTCCTCAAA |
| **M5** | TTTGAGGAGC**GGGGCGTGG**CCATTCCTCC | GGAGGAATGG**CCACGCCCC**GCTCCTCAAA |

**Table S5.** The wild-type and mutant *LCI5* promoter sequences were used for GMSA. The one where the mutation was highlighted by bold purple color. The oligo annealing and probe labeling are as the same as mentioned on legend Table S3.

Table S6. Primers used to amplify promoters

| Primer Name | Primer sequence |
| --- | --- |
| LCI1_5P | AAGGAAAAAA***GCGGCCGC*** AACATCCGCTGCATTCAGG |
| LCI1_3P | AAGGAAAAAA***TTCGAA***TGCAACACACTAGTTAATCACCT |
| LCIB_5P | AAGGAAAAAA***GCGGCCGC***TCGATGATGGGGCAAGTTTC |
| LCIB_3P | AAGGAAAAAA***TTCGAA***ACTGTGTTTGGGAGCAGGA |
| LCI5_5P | AAGGAAAAAA***GCGGCCGC***TTACTCGCACTGCCCAGC |
| LCI5_3P | AAGGAAAAAA***TTCGAA***AAGGTGAATCTGTGCGCGC |
| LCI1_MF | GTTG**GGGGAGGG**GTTG |
| LCI1_MR | CAA**CCCCTCCCC**CAAC |
| LCIB_MF | TGGC**GGGGAGGGG**CC |
| LCIB_MR | GG**CCCCTCCCC**GCCA |
| LCI5_MF1 | AGC**GGGGTGGGG**CCA |
| LCI5_MR1 | TGG**CCCCACCCC**GCT |
| LCI5_MF2 | AGC**GGGTCGGGG**CCA |
| LCI5_MR2 | TGG**CCCCGACCC**GCT |
| LCI5_MF3 | AGC**GGAGCGGGG**CCA |
| LCI5_MR3 | TGG**CCCCGCTCC**GCT |

**Table S6.** Primers used to amplify *LCIB*, *LCI1* and *LCI5* promoters for *in vivo* *ad1* mutant complementation experiments. Primer pairs 5P and 3P were used to amplify each of the wild type promoter sequences (about 800bp ~ 1000bp upstream of +1), the primer pairs 5P and MR or MF and 3P were used to amplify each partial promoter containing the desired mutation, then 5P/3P primer pairs were used to ligate each partial fragments together by fusion PCR to generate mutated promoters. The promoters were inserted into pBluescript II KS_LCIB through *Not*I/*Sfu*I to generate final constructs LCI1PB/M, LCIBPB/M and LCI5PB/M1/M2/M3 (M stands for mutation). *Not*I/*Sfu*I sites are highlighted as italic bold red, the conserved GC motifs are marked as bold red font, and mutated nucleotides are indicated in bold purple.


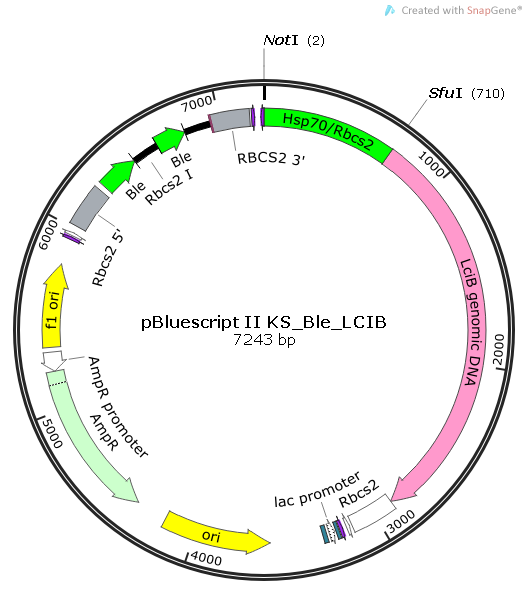


**Fig. S1.** The map of pBluescript II KS_Ble_LCIB, which was used for cloning the *LCIB*, *LCI1* and *LCI5* promoters in place of the HSP70/Rbcs2 promoter in the plasmid.


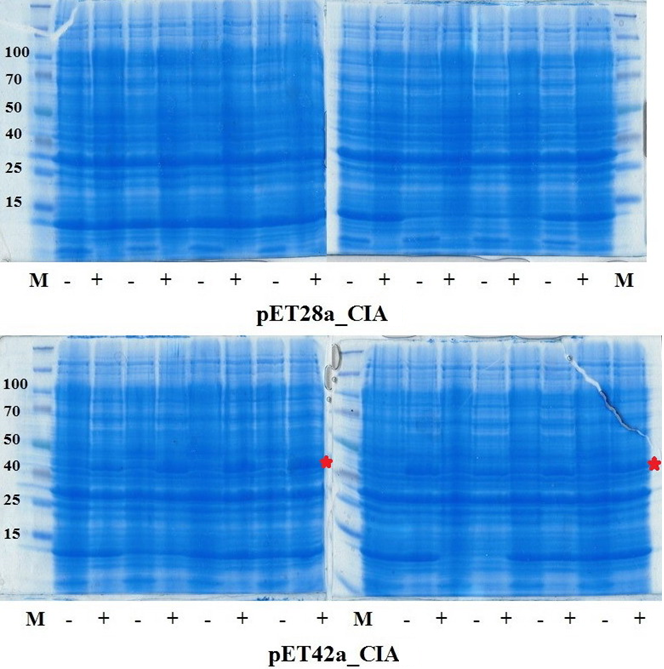


**Fig. S2.** Overexpression of CIA5 in *E. coli*. Full length *CIA5* coding DNA sequence (CDS) was amplified from a subcloned cosmid containing the full length *CIA5* CDS, and sub-cloned into *E. coli* expression vector pET28a (His-tag) and pET42a (His- and GST-tag) through *EcoR*I/*Sal*I site to generate the final constructs pET28a_CIA and pET42a_CIA, then transformed into *E. coli* BL21-CodonPlus (DE3) (see material and methods). The expected fusion protein size should be more than 70kD and 100kD in pET28a_CIA and pET42a_CIA (220aa GST-tag), respectively. None of 8 transformants for each construct with or without IPTG induction, showed expected protein size. Only pET42a_CIA constructs shows an IPTG inducible response, but with the incorrect protein size (marked with red star, around 42 kD).


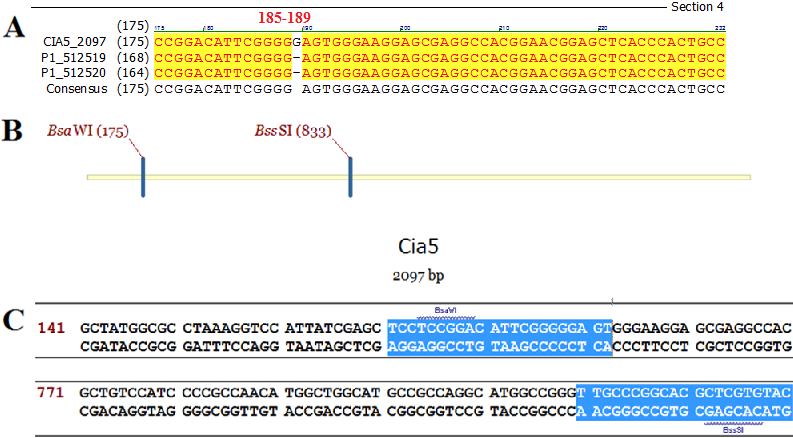


**Fig. S3.** Schematic showing reconstruction of the *CIA5* to repair error. Upper panel indicates one G missing around 185 to 189 nt. Middle panel indicates the position and use of two unique restriction enzyme site to overcome the missing “G” error. Bottom panel shows the primers used to correct the sequence error.


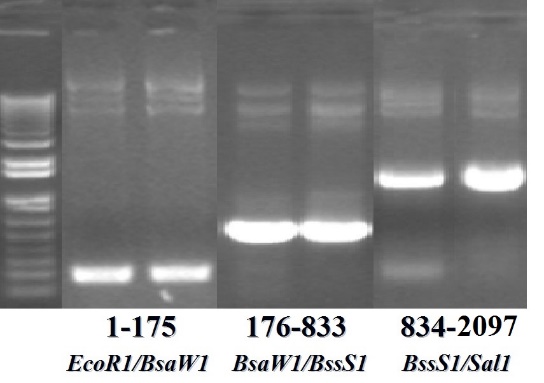


**Fig. S4.** Three PCR fragments containing *CIA5* CDS to be used for constructing full-length *CIA5* CDS. These three fragments were purified (Qiagen Gel Extraction Kit, Cat. No. 28704) and digested with *EcoR*I/*BsaW*I, *BsaW*I/*BssS*I and *BssS*I/*Sal*I, then ligated with *EcoR*I/*Sal*I digested vector in a 4-fragments ligation to regenerate the pET28a_CIA5 and pET42a_CIA5 constructs.


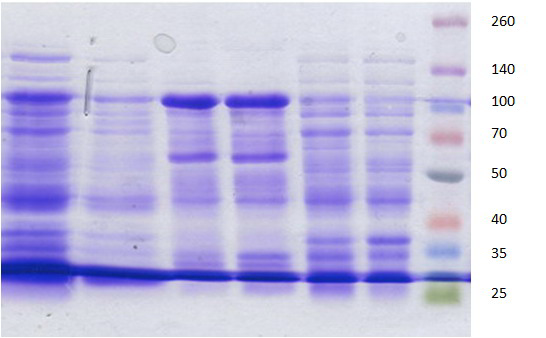


**Fig. S5.** His-CIA5 purification from pET28a_CIA5. Lane 1: total extraction; Lane 2: flow-through; Lane 3-4: elution; Lane 5-6: wash.


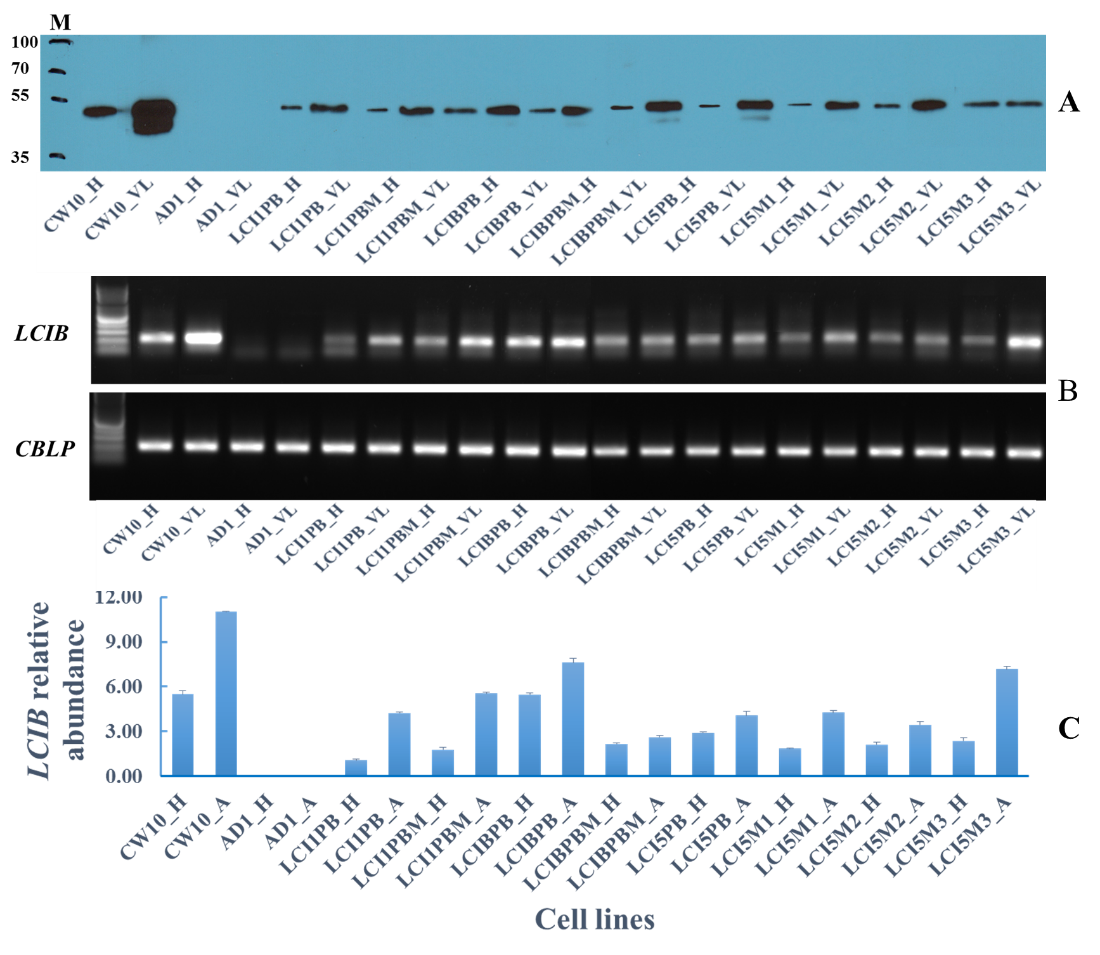


**Fig. S6.** Analysis of *LCIB* gene expression under different conditions. **A:** Western immunoblot analysis of *LCIB* expression among all *ad1* transformants complemented with *LCIB* under regulation by *LCI1*, *LCIB* or *LCI5* promoter sequences in either high CO2 (H) or air-level CO2 (A). LCI1PB/M, LCIBPB/M and LCI5PB/M1/M2/M3 indicate various *ad1* transformants complemented with *LCIB* containing either *LCI1*, *LCIB* or *LCI5* promoter; **B:** RT-PCR analysis of *LCIB* gene expression as transcript abundance among all *ad1* transformants complemented with *LCIB* under regulation by *LCI1*, *LCIB* or *LCI5* promoter sequences in either high CO2 (H) or air-level CO2 (A). LCI1PB/M, LCIBPB/M and LCI5PB/M1/M2/M3 indicate various *ad1* transformants complemented with *LCIB* containing either *LCI1*, *LCIB* or *LCI5* promoter: **C:** qRT-PCR analysis of *LCIB* gene expression as transcript abundance among all *ad1* transformants complemented with *LCIB* under regulation by *LCI1*, *LCIB* or *LCI5* promoter sequences in either high CO2 (H) or air-level CO2 (A). LCI1PB/M, LCIBPB/M and LCI5PB/M1/M2/M3 indicate various *ad1* transformants complemented with *LCIB* containing either *LCI1*, *LCIB* or *LCI5* promoter (M stands for mutation).

**References**

[1] S. Philipsen, G. Suske, A tale of three fingers: the family of mammalian Sp/XKLF transcription factors, Nucleic Acids Res, 27 (1999) 2991-3000.

[2] T. Kamiuchi, E. Abe, M. Imanishi, T. Kaji, M. Nagaoka, Y. Sugiura, Artificial nine zinc-finger peptide with 30 base pair binding sites, Biochemistry, 37 (1998) 13827-13834.

[3] K. Van, M.H. Spalding, Periplasmic carbonic anhydrase structural gene (Cah1) mutant in *chlamydomonas reinhardtii*, Plant Physiol, 120 (1999) 757-764.

[4] W. Fang, Y. Si, S. Douglass, D. Casero, S.S. Merchant, M. Pellegrini, I. Ladunga, P. Liu, M.H. Spalding, Transcriptome-wide changes in *Chlamydomonas reinhardtii* gene expression regulated by carbon dioxide and the CO2-concentrating mechanism regulator CIA5/CCM1, The Plant cell, 24 (2012) 1876-1893.

[5] D. Duanmu, Y. Wang, M.H. Spalding, Thylakoid lumen carbonic anhydrase (CAH3) mutation suppresses air-Dier phenotype of LCIB mutant in *Chlamydomonas reinhardtii*, Plant physiology, 149 (2009) 929-937.
